# Supplementary material for: Can higher-calorie feeding protocols for patients with eating disorders admitted to an adult hospital ward be safely implemented to reduce the length of stay? A scoping review
Source: Research Square preprint supplement (doi:10.21203/rs.3.rs-8537410/v1), 2026-01-23
Supplement: Supplementary file 1 [file b9f6f2bdc8b2a6e838fbdfef.docx]

| **Author (year)**  **Country** | **Study design and setting** | **Study Aim/s** | **Participants (n) and age, y mean (SD)** | **Exclusion Criteria** | **Refeeding protocol** | **Incidence of Refeeding syndrome/hypophosphataemia** | **Rate of weight gain and length of stay** | **Relevant results** |
| --- | --- | --- | --- | --- | --- | --- | --- | --- |
| Haynos et al. (2016)  USA | Natural experiment design  Inpatient eating disorder unit | 1) Effect of change in caloric prescription plan on weight gain  2) Do standardised caloric plans impact LOS, discharge BMI, and maximum caloric prescription | Individualised (n=35) vs standardised (n=35) caloric plan  Subsample (n=20) for secondary analysis  All participants' diagnosis of AN  Mean age: 24.51-26.34 years old (SD 6.4-7.3) | Discharge from inpatient unit prior to the second week of hospitalisation  Medical illness unrelated to ED affected the ability to gain weight | Standardised approach:  1800kcal/d for the first week of admission.  Incremental 300-400kcal increase every 2-3 days thereafter until 90% Ideal Body Weight (IBW) achieved  Increases occurred independent of actual wt gain  Individualised approach: Initially 1800kcal/d  An increase only occurred if wt failed to increase by 0.75lbs on weigh-in day and was achieved by consuming 400kcal of food /250kcal of liquid supplements. Did not exceed 4000kcal/d | No notes of any cases RFS requiring medical care under either protocol  RFS measured by presence of oedema throughout treatment | Mean Admission BMI 15.84-15.97 (SD 1.39-2.00)  Aim to restore weight to 90% IBW (BMI 19.5)  Weight gain 0.35kg over the previous highest weight each week | Linear relationship of time to weekly rate of wt gain in standardised plan*  Standardised plans gained wt faster compared to individualised*  The standardised plan did not significantly affect LOS, discharge BMI, or maximum caloric prescription.  Admission BMI as a covariate predicted time to wt restoration, presence of oedema and length of hospital stay* |
| Stranjord (2016)  USA | Retrospective chart review  Inpatient hospital setting | Describe an inpatient nutritional insufficiency care path and compare treatment outcomes at an academic medical centre and a community hospital | Academic medical centre (n=51) vs Community Hospital setting (n=39)  Age - Range: 8-23 years. Median: 17 years. | Admissions <24 hours  Interhospital transfers between the sites | Initial median rate 2200(1750-2550) kcal.  Increased by 250 (250-294) kcal in the academic centre and 305(250-525) kcal in the community hospital per day.  Weight gain goal of 0.2kg/day. | Hypophosphataemia defined as <2.5mg/dL  Hypomagnesaemia defined as <1.7mg/dL  Hypokalaemia defined as <3.5 meq/L  No clinical cases of refeeding, 1 patient had hypophosphatemia | Rate of wt gain 0.3 (0.1-0.4) kg/d in the academic centre and 0.2 (0.0-0.4) kg/d in the community hospital  Median LOS was 3 days for both groups | Missed repeated laboratory studies during admission, likely underreported  No weight criteria for discharge |
| Matthews et al. (2018)  Australia | Retrospective observational  pre-test-post-test study  Tertiary referral hospital | Compare the occurrence of RFS in LCR and HCR in medically compromised adult ED consumers | N=119  Adults >18 years old at the time of inpatient admission with an ED diagnosis  Mean Age: 27±9 years old | Admitted to ICU  Renal conditions Pregnant  LOS < 5 days | LCR:  Initially 1000kcal/d  Progressed by 500kcal/d every 3 to 4 days until the goal rate is achieved.  Goal rate either individualised or 2400kcal  HCR:  Initially 1500kcal/d  Progressed by 500kcal/d every 48hours until the standardised goal rate of 3000kcal/d was reached | No incidence RFS was reported in either group.  Hypophosphatemia  Definitions  Present: <0.81mmol/L  Mild: <0.68mmmol/L  Critical: <0.32mmol/L | Admission BMI 14.9±2.6 in LCR and 17.2±3.0 in HCR  Patients gained 1.8±2.4kg with LCR and 2.3±2.3 HCR during acute admission.  Length of stay or weight gain did not reach significance between groups | Improved adherence in HCR protocol compared to LCR* |
| Dalenbrook et al. (2020) Germany | Single-centre study  Inpatient eating disorder unit | Assess outcomes of an HCR protocol for adolescents with severe AN treated in a specialist eating disorder hospital | N=120  12-20 years old with primary diagnosis AN (any type)  BMI < 15 kg/m2  Mean age: 17.3 ± 1.8 years | Pregnancy  Bulimia nervosa  schizophrenia or psychosis | Initial = 2000kcal/d for all patients  Aim for 700-1000g weight gain/wk | No incidence of refeeding syndrome  RFS, based on Rio et al., is defined as all the following criteria:  Critically low serum electrolyte concentrations  Potassium <2.5mmol/L  Phosphate <0.32 mmol/L  Magnesium <0.50 mmol/L   Focused on serum phosphate concentrations as an indicator of impending refeeding syndrome | Baseline 35.6kg (± 4.0kg),  Day 28 38.6kg (± 4.2kg)  Average of 3kg weight gain over 28 days  LOS 38.4 (SD ± 28.4) days  Mean BMI at baseline 13.1±1.1kg/m2 to 16.7±1.8kg/m2 at discharge* | HCR was not associated with refeeding even in severely malnourished adolescents with AN |
| Gibson et al. (2020)  USA | Retrospective chart review  Inpatient eating disorder unit | Evaluation of medical complications observed in patients with extreme AN | N=281  Age – Range: 18-66 years. Median: 28 years  Weighed < 65% Ideal Body Weight (IBW) | Hospitalised for < 72 hours  >65% IBW on admission | Initial caloric intake ranged 800-2450kcal/d, with an average 1431kcal/d for females and an average 1714kcal/d for males  The average caloric intake for females at the time of discharge was 3119 kcal/d (SD=733) and 3744 kcal/d for males (SD=829). | No deaths during medical stabilisation, n=20 (7%) required ICU transfer  n=98 (35%) developed refeeding hypophosphatemia, with n= 46 developing critical hypophosphataemia  Hypophosphataemia definitions:  Mild: <0.87mmol/L  Critical: <0.71mmol/L | Admission BMI mean 12.1 (range 7.5-15.7)  Patients gained 2kg/wk (SD =1.5) during acute admission.  Average per cent IBW increased by 12% (SD=8.4) and average BMI increased by 2.5kg/m2 (SD= 1.5) by time of discharge  Median LOS = 22 days | No significant difference in weight gain/wk between genders (p = 0.84)  Average nadir BMI between patients who developed RF hypophosphataemia (M= 11.8kg/m2, SD = 1.4) compared to those who did not (M = 12.4kg/m2, SD = 1.3)* |
| Gjoertz et al. (2020)  Switzerland | Retrospective chart review  Inpatient hospital setting | Impact of introducing a clinical refeeding guideline for AN implemented in an inpatient setting | N=107  n=33 in the pre-guideline group; n=74 in the post-guideline group, aged 13-55 years, with a diagnosis of AN.  Mean age at admission 27.6 ± 10.5 years (range 16.2– 53.3) in the first group, and 26.6 ± 11.5 years (range 13.6– 55.8) in the second group | N=18 excluded.  Diagnosis of bulimia (n = 10), hospitalisation shorter than 7 days (n = 3), and a “respite” or “observation” type hospitalisation (n = 5). | Prior to Guideline: 75% of basic energy needs, energy added to ensure weight gain 500g/wk  Refeeding guideline: Stepwise approach. Energy needs defined as 35kcal/kg/d for adults and 40-50kcal/kg/d for adolescents depending on age and sex.  In the first week, patients receive 50% of their individual basic energy needs at day 1, 75% at day 3, and 100% at day 6. During the second week, the basic energy needs are reached, and 300 kcal is added respectively every 3 days up to 1000 kcal, thus equaling 7000 kcal/wk, which corresponds to a gain of 1 kg/wk  The aim was a systematic wt increase of >1 kg every  week | Hypophosphataemia as per NICE Guidelines, defined as <0.8mmol/L  Every patient received supplemental B1, folic acid, multivitamin, and Ca with Vit.D for 2-4weeks  Oral replacement introduced if there are electrolyte deficiencies  No incidence of refeeding syndrome | Mean weight gain of 7  ± 4.8 kg (range −1 to 17.3) vs 5.8 ± 4.5 kg (range −1.7 to 2.0kg)  Mean BMI at admission was  14.3 ± 1.9 kg/m2 (range 11–19.8) before and 15 ± 1.8 kg/m2  (range 9.3–20.4)  BMI at discharge was 17 ±  1.5 kg/m2 (range 13.7–20.7) before vs 17.2 ± 1.6 kg/m2  (range 11.9–20)  The mean length of hospitalisation decreased from 96.7 ± 48.3 days (range 9–180) to 62.2 ± 45.5 days (range 7–264)* | Only 6.3% of patients demonstrated optimal weight gain after the first 2 weeks prior to introduction compared with 41.8% after the guideline*  In the first 2 weeks, 36.4% gained weight in the first group as opposed to 64.9% in the second group*, even though one-fifth in both groups demonstrated wt loss. |
| Koerner et al. (2020)  Germany | Retrospective  naturalistic observation study  Inpatient eating disorder unit | Impact of implementing an HCR protocol for adult AN ED consumers on medical parameters such as changes in wt, blood phosphate levels and risk of RFS | N=103  Females aged 23.8±5.3 (range = 18-47) years with AN, BMI ≤13kg/m2 and retention period ≥28 days | <18 years old  BMI > 13kg/m2  Other ED diagnoses | Initial oral meal plan 2000kcal/d  Up to >4000kcal/d  Calories adjustment individualised based on not meeting weight gain aim | Own criteria for RFS;  Critical drop serum phosphate defined as <0.75mmol/L and critical deterioration of general condition (e.g. severe oedema, pericardial effusion, weakness)  No patients experienced critical deterioration. No case of RFS reported.  N=7 (6.2%) hypophosphatemia <0.75mmol/L, one person critical <0.5mmol/L on admission, 0 pathologic after 4 weeks  4-week admission, changes in LOS were not measured in the study | Aimed for wt increase 0.7-1.0kg/wk  Wt increased on average 1.0±0.5kg/wk and by a total of 4.2±2.0kg over four weeks*  Total increase 1.4±0.8 BMI units in four weeks# | Individual energy intake and adherence to dietary recommendations were not recorded |
| Richardson et al. (2021)  Canada | Retrospective chart review  Inpatient eating disorder unit | Review charts of all inpatients with an ED admitted to the program. Primary objective = assess if medical parameters i.e. presence of hypophosphataemia at admission were related to clinical outcome | N=288 admissions n=235 admissions met the 'significantly' medically compromised group n=17 met 'moderately' compromised group  32.5 (SD = 11.4) years | None. Those who didn’t fit significant or moderate groups were assigned to 'other' (n=36) | Changes in increases per week of treatment from an additional 200-300kcal/wk to ~600kcal/wk in 2019.  Week 1 prescribed 1682 (SD = 352) kcal in the significant group, and weekly increases up to Week 4 2538 (SD = 502)kcal in the significant group | Hypophosphataemia defined as <0.80mmol/L  Those who developed hypophosphataemia had lower admission BMI (BMI 14.1 SD = 3.58 vs 16.4, SD = 3.51)*  Only hypophosphataemia was found to be a statistically significant predictor of ICU admission. However, no patients were transferred ICU due to this. | Mean BMI at admission = 14.8 (SD = 1.8), range = 10.2-18.4kg/m2  Mean BMI at 4 weeks = 16.1 (SD=1.9), range = 11.2-21.3kg/m2  Rate of weight gain was not commented on.  Mean LOS = 38.4 (SD = 28.4) days, (range = 1-126 days, 1 outlier 253 days). No data on changes in LOS | Refeeding syndrome was not discussed. Incidence of hypophosphatemia was key measure.  BMI at admission was associated with BMI at 4 weeks* |
| Cuntz et al. (2022)  Germany | Retrospective  observational study  Inpatient eating disorder unit | 1) Risk estimation based on labs to judge the overall health status in AN and RFS 2) Use risk estimation to evaluate health status during RFS using a HCR protocol | Sample 1 n=3230  Sample 2 n = 520  Mean age 22.5 years, range 12-73 years old, with AN and BMI <13kg/m2  Retention period ≥28 days | Adm <28d, missing complete data set  <18yrs | Initial 2000kcal Up to 4000kcal  Calories adjusted according to wt development to aim for an increase in BW 0.7-1.0kg/wk.  Aim for 700-1000g/wk gain. 100g per day | Hypophosphataemia definition  Critical: <0.5mmol/L  N=16 hypophosphataemia (11 <0.75mmol/L, 5 <0.5mmol/L) at start of admission with mean BMI 11.5kg/m2  Serum PO4 increased under supplementation. No cases of hypophosphataemia occurred, except for those with low PO4 at admission. After 2 weeks, all but n=1 was within normal range. | Mean weight gain first week 2.1kg, followed by min. 700g in the next 3 weeks. Mean total weight gain was 4.15kg ± 1.96kg  Mean BMI 15.4 kg/m2 (range 9.4-26.8) – some had been in remission. Mean BMI admission to 28 days 1.7±0.9kg/m2*  No data on LOS | Negative correlation with RFS risk and BMI*+ |
| Kells et al. (2022) USA | Retrospective chart review  Inpatient eating disorder unit | Identify individual factors and clinical interventions that contribute to the development of RH for adolescents and young adults admitted to a general medical unit with AN | N=300  10-24 years. Mean age = 15.5 years with an AN diagnosis (any) | BN, BED, Severe Mental Illness (schizophrenia, schizoaffective disorder)  Other feeding methods besides oral and NG  Medical or psychiatric hospitalisation within the last 14 days | 1000-3000kcal/d, most increased by 250kcal/d  Initial calorie prescription: mean 1714kcal/d (SD = 324.2kcal/d)  Aim for 0.2kg/d wt gain | RH defined as serum phosphate <0.90mmol/L  N=86 (28.7%) reported hypophosphataemia at some point during hospital stay.  Mean day occurrence = 3.9 (SD = 3.4)  Phosphorous Prophylaxis 250mg BD + MV  Predictors of RH = Serum Mg, K, NG feeding, wt gain during adx, age on adx  Mg nadir and BMI on adx predictors of PO4 nadir despite standardised PO4 supplementation | Average wt gain during hospitalisation = 1.8kg (SD = 1.5kg)  Mean LOS = 7.4 days (SD = 5.9 days) | Mean BMI on admission 16.3 (SD = 2.6), did not measure discharge BMI.  Supportive of prophylactic PO4 supplementation  Measured RH, not refeeding syndrome |
| Staab et al. (2022)  Canada | Cohort  natural quasi-experimental design  Inpatient and day hospital eating disorder unit | Change of refeeding protocol and impact on wt gain, LOS and RFS occurrence in inpatient and day program  Secondary aims to look at safety indicators i.e. electrolyte disturbances and supplementation, RFS, transfer to internal medical ward, completion of program | N=326 inpatients  BMI <18kg/m2  Mean age HCR 28.83 (SD 11.01) years old and LCR 29.27 (SD 11.8) years old  Admissions were treated independently for patients admitted more than once during the study period | Other ED Dx (ARFID, EDNOS, BN)  Inpatient stay <7 days  Required NGT/modified meal plan based on other medical diagnoses | LCR: initially 1500-1600kcal/d and gradually increased by 300kcal each week up to maintenance level 2100-2300kcal/d.  Calorie level maintained as long as pt gaining >1kg/week. If not, further increased by 300kcal/week.  HCR: Initially 1600-1800kcal/day and increased by 600kcal/week to 2800kcal/day by day 21, regardless of wt gain. If patients failed to gain 1kg/week, further increase 300-400kcal/day | Hypophosphataemia defined as present if below the reference range 0.87-1.52mmol/L. Mild = 0.65-0.91mmol/L Mod = 0.32-0.64mmol/L Severe = <0.31mmol/L  Severe Hypokalaemia = <2.5mmol/L Severe Hypomagnesaemia = <0.50mmol/L  Hypophosphataemia was not significantly different between slow and rapid RF protocols after admission. No cases of severe hypophosphataemia in either group. Total cases mild and moderate hypophosphataemia not sig. between groups  No deaths or cases RFS with either protocol over the 14-year period  Amount PO4 supplements used to treat PO4 deficiencies was higher in the slow protocol compared to the rapid protocol | Mean admission weight 39.88kg (SD 5.79)  Mean admission BMI 14.88 (SD 1.38)  HCR gained 0.21kg/wk more compared to LCR. Higher rate of wt gain in IPU setting (1.30kg/week compared to 1.08kg/week)#  Average LOS = 40 days in Rapid RF Protocol compared to Average LOS = 53 days in slow RF Protocol.  LOS 21 days shorter for pts on HCR vs LCR* | No statistically significant differences between the two cohorts  Reduction in mean days to reach target BMI 19.5kg/m2 between LCR (81.61 SD 30.20) and HCR (59.04 SD 24.52)*  Electrolyte supplementation was used more in LCR vs HCR participants. |
